# Supplementary material for: Introducing clinical pharmacy services to cardiovascular clinics at a university hospital in Northern Cyprus
Source: Springer Nature journal article supplement (doi:10.1007/s11096-017-0534-3), 2017-10-03
Supplement: MOESM1 [file 16453798]

Supplementary I: Baseline medication class and diet supplement-related characteristics according to DRP type using the PCNE DRP classification tool V6.2. code, n (%).

| Number | P1  107(49.3%) | P2  74(34.1%) | P3  32(14.7%) | P4  4(1.8%) | Total number  =217(100.0%) |
| --- | --- | --- | --- | --- | --- |
| **Medication numbers** | 100(93.5) | 68(91.9) | 30(93.8) | 4(100.0) | 202(93.1) |
| Beta-blockers | 11(10.3) | 8(10.8) | 1(3.1) | 0(0.0) | 20(9.2) |
| ACE/ARB inhibitors | 21(19.6) | 6(8.1) | 1(3.1) | 0(0.0) | 28(12.9) |
| Calcium channel blockers | 4(3.7) | 4(5.4) | 0(0.0) | 0(0.0) | 8(3.7) |
| Alpha blockers | 0(0.0) | 1(1.4) | 1(3.1) | 0(0.0) | 2(0.9) |
| Diuretics | 5(4.7) | 21(28.4) | 1(3.1) | 0(0.0) | 27(12.4) |
| Digitalis glycosides | 2(1.9) | 1(1.4) | 0(0.0) | 0(0.0) | 3(1.4) |
| Antihyperlipidemic agents | 5(4.7) | 0(0.0) | 1(3.1) | 0(0.0) | 6(2.8) |
| Nitrovasodilators | 0(0.0) | 2(2.7) | 1(3.1) | 0(0.0) | 3(1.4) |
| Anti-arithmetic agents | 0(0.0) | 0(0.0) | 2(6.3) | 0(0.0) | 2(0.9) |
| Anticoagulants | 14(13.1) | 7(9.5) | 3(9.4) | 0(0.0) | 24(11.1) |
| Antiplatelet agents | 3(2.8) | 4(5.4) | 2(6.3) | 0(0.0) | 9(4.1) |
| Miscellaneous cardiovascular agents | 5(4.7) | 0(0.0) | 0(0.0) | 0(0.0) | 5(2.3) |
| Antidiabetic agents | 0(0.0) | 7(9.5) | 0(0.0) | 0(0.0) | 7(3.2) |
| Proton pump inhibitors | 20(18.7) | 0(0.0) | 2(6.3) | 4(100.0) | 26(12.0) |
| Thyroid hormones | 1(0.9) | 0(0.0) | 0(0.0) | 0(0.0) | 1(0.5) |
| NSAIDs | 4(3.7) | 1(1.4) | 0(0.0) | 0(0.0) | 5(2.3) |
| Antibiotics | 0(0.0) | 3(4.1) | 5(15.6) | 0(0.0) | 8(3.7) |
| Anxiolytics | 1(0.9) | 0(0.0) | 3(9.4) | 0(0.0) | 4(1.8) |
| Antidepressants | 1(0.9) | 0(0.0) | 4(12.5) | 0(0.0) | 5(2.3) |
| Antihyperuricemic agents | 1(0.9) | 0(0.0) | 0(0.0) | 0(0.0) | 1(0.5) |
| Beta agonists | 1(0.9) | 0(0.0) | 0(0.0) | 0(0.0) | 1(0.5) |
| Corticosteroids | 0(0.0) | 0(0.0) | 0(0.0) | 0(0.0) | 0(0.0) |
| Laxatives | 0(0.0) | 1(1.4) | 0(0.0) | 0(0.0) | 1(0.5) |
| Others | 1(0.9) | 2(2.7) | 3(9.4) | 0(0.0) | 6(2.8) |
| **Diet supplement numbers** | 7(6.5) | 6(8.1) | 2(6.3) | 0(0.0) | 15(6.9) |
| Vitamins | 1(0.9) | 0(0.0) | 0(0.0) | 0(0.0) | 1(0.5) |
| Minerals | 6(5.6) | 5(6.8) | 0(0.0) | 0(0.0) | 11(5.1) |
| Polyunsaturated fatty acids | 0(0.0) | 1(1.4) | 0(0.0) | 0(0.0) | 1(0.5) |
| Herbs | 0(0.0) | 0(0.0) | 2(6.3) | 0(0.0) | 2(0.9) |

*Abbreviations:*

*P1 Treatment effectiveness.*

*P2 Adverse reactions.*

*P3 Treatment costs.*

*P4 Other.*
